# Supplementary material for: A retrospective study assessing the factors associated with visual outcome in retinal vein occlusion patients after anti-VEGF therapy
Source: PeerJ. 2021 Dec 6;9:e12599. doi: 10.7717/peerj.12599 (PMC8656372; doi:10.7717/peerj.12599)
Supplement: Supplemental Information 1 [file peerj-09-12599-s001.xlsx]

## Sheet: sheet 1
No.	age	gender(male=1/female=2)	time from onset to treatment	hypertension(no=0/yes=1)	therapeutic effect of hypertension(controlled=0/uncontrolled=1)	hyperlipemia(no=0/yes=1)	therapeutic effect of hyperlipemia(controlled=0/uncontrolled=1)	smoking(no=0/yes=1)	injection frequency	central retinal thickness at baseline	central retinal thickness after treatment	BCVA at baseline	BCVA after treatment	type of RVO(CRVO=1/BRVO=2)	ELM disruption (absence=0/presence=1)	EZ disruption (absence=0/presence=1)	LZ disruption (absence=0/presence=1)	DRIL (absence=0/presence=1)	IRF (absence=0/presence=1)	SRF (absence=0/presence=1)
1	69	2	90	0	NA	0	NA	1	2	703	221	0.15	0.6	2	0	0	0	1	1	0
2	54	1	87	1	0	1	0	0	5	629	242	0.4	0.8	1	0	0	0	1	0	1
3	54	2	20	0	NA	0	NA	0	2	341	142	0.2	0.6	2	0	0	0	0	0	1
4	82	1	31	0	NA	0	NA	1	5	636	182	0.2	0.6	2	0	0	1	1	0	0
5	46	1	20	0	NA	0	NA	0	3	1033	183	0.12	0.5	2	0	1	0	0	1	0
6	44	1	30	0	NA	1	0	1	3	802	201	0.12	0.5	2	1	0	0	0	1	1
7	73	2	68	0	NA	0	NA	0	4	748	521	0.15	0.5	2	0	1	1	0	0	0
8	53	2	120	1	1	1	0	1	1	559	233	0.1	0.4	1	1	0	0	0	1	0
9	38	2	60	0	NA	0	NA	0	1	697	345	0.1	0.4	2	0	0	0	0	1	1
10	49	1	15	0	NA	1	1	1	1	309	195	0.5	0.8	2	1	0	0	1	0	0
11	46	2	30	0	NA	1	0	1	4	966	229	0.2	0.5	2	0	1	1	0	1	1
12	56	2	60	0	NA	1	0	0	2	328	192	0.2	0.5	2	0	1	1	0	1	0
13	50	2	10	0	NA	0	NA	0	2	637	262	0.6	0.8	1	0	0	0	0	0	0
14	53	2	10	0	NA	0	NA	1	7	318	210	0.05	0.25	1	1	1	1	0	1	1
15	61	2	60	0	NA	0	NA	0	3	394	211	0.3	0.5	2	0	1	1	1	1	0
16	49	1	15	0	NA	1	0	1	2	316	192	0.05	0.25	2	0	0	0	0	1	1
17	41	1	61	1	0	0	NA	0	3	536	216	0.3	0.5	2	0	0	0	1	0	0
18	56	2	7	0	NA	0	NA	0	1	843	286	0.1	0.3	1	1	1	1	0	1	1
19	70	2	85	0	NA	0	NA	1	3	423	147	0.02	0.2	2	0	1	1	0	1	1
20	72	2	80	1	0	0	NA	0	1	426	236	0.12	0.3	1	1	1	0	0	1	0
21	68	2	38	0	NA	0	NA	0	3	794	257	0.12	0.3	2	1	0	0	1	1	1
22	54	2	30	0	NA	1	1	1	2	806	273	0.08	0.25	2	0	1	1	0	1	1
23	57	2	93	0	NA	0	NA	1	2	780	233	0.25	0.4	2	0	0	0	0	1	0
24	42	2	7	1	0	0	NA	1	5	591	192	0.25	0.4	2	0	0	0	0	1	1
25	62	2	90	0	NA	0	NA	0	3	328	149	0.1	0.25	2	1	1	1	1	1	1
26	56	2	30	0	NA	0	NA	1	1	748	582	0.15	0.3	2	1	0	0	0	1	1
27	79	2	60	0	NA	0	NA	0	3	808	205	0.1	0.25	1	0	0	0	0	1	0
28	39	2	30	0	NA	1	0	0	1	341	329	0.12	0.25	1	0	1	1	1	1	0
29	45	1	7	1	0	0	NA	0	3	312	227	0.1	0.2	2	0	0	1	0	1	1
30	47	2	20	0	NA	1	0	1	3	683	132	0.1	0.2	2	1	1	0	0	1	1
31	70	2	15	0	NA	0	NA	0	4	634	168	0.2	0.3	2	1	0	1	1	1	1
32	45	2	15	1	0	0	NA	0	1	751	217	0.2	0.3	2	0	0	0	0	1	1
33	68	1	7	0	NA	1	1	1	5	1208	205	0.01	0.1	1	1	1	1	0	1	0
34	67	2	69	0	NA	0	NA	0	2	328	234	0.15	0.2	2	1	0	0	0	1	1
35	71	1	84	0	NA	0	NA	1	5	548	148	0.02	0.05	2	1	1	1	0	1	0
36	69	2	30	1	0	0	NA	0	1	346	244	0.12	0.15	2	0	1	1	1	1	1
37	44	2	90	0	NA	0	NA	0	3	321	279	0.12	0.15	2	1	1	1	0	1	0
38	68	2	81	0	NA	1	0	0	2	327	197	0.12	0.15	2	0	1	1	1	1	1
39	43	1	20	1	0	0	NA	1	1	306	214	0.1	0.12	1	1	0	0	0	1	0
40	65	1	95	0	NA	0	NA	0	1	326	142	0.1	0.12	2	0	0	0	0	1	1
41	42	1	13	1	0	0	NA	0	2	342	193	0.1	0.12	2	0	1	1	0	1	1
42	71	2	30	0	NA	1	0	0	1	368	362	0.02	0.02	1	1	1	1	1	1	1
43	68	2	180	1	0	1	0	1	1	336	240	0.05	0.05	2	1	1	1	0	1	1
44	62	1	10	1	0	0	NA	1	1	316	268	0.05	0.05	2	1	1	1	0	1	1
45	64	1	30	0	NA	1	0	1	1	538	521	0.15	0.15	2	0	0	1	1	1	1
46	73	2	30	1	0	1	1	1	1	361	118	0.05	0.05	1	1	1	1	0	1	1
47	74	1	105	1	0	0	NA	0	1	683	664	0.04	0.04	1	1	1	1	1	1	0
48	76	1	30	0	NA	1	0	1	1	645	632	0.09	0.09	2	1	1	1	0	1	1
49	54	2	60	1	0	0	NA	1	1	321	213	0.2	0.2	2	1	0	0	1	0	0
50	48	1	3	0	NA	1	1	1	2	479	453	0.02	0.02	2	1	1	1	0	1	0
51	44	2	4	0	NA	1	1	1	1	352	197	0.4	0.4	2	1	0	0	0	1	1
52	56	2	15	1	0	1	0	1	1	321	319	0.1	0.1	1	0	0	0	1	1	1
53	47	1	30	1	1	0	NA	1	1	312	133	0.5	0.5	2	0	0	1	1	0	1
54	69	2	7	1	0	1	0	0	4	1076	1024	0.15	0.15	1	1	0	0	0	1	0
55	55	1	60	1	0	1	0	1	1	547	539	0.01	0.01	1	1	1	1	1	1	0
56	64	2	70	0	NA	0	NA	0	1	479	463	0.08	0.08	1	1	1	1	0	1	1
57	57	2	60	1	0	1	0	1	1	359	279	0.15	0.15	2	1	0	0	1	1	1
58	46	2	10	1	0	1	0	0	1	431	412	0.3	0.3	2	1	0	1	0	1	0
59	72	1	15	0	NA	0	NA	0	1	352	335	0.1	0.1	2	1	1	1	1	1	1
60	56	2	30	1	0	1	1	1	2	412	396	0.3	0.3	2	0	1	1	1	1	0
61	74	1	10	1	0	1	0	1	1	742	680	0.02	0.02	2	1	0	0	1	1	1
62	79	2	30	1	0	1	0	1	1	431	368	0.1	0.1	2	0	1	1	1	1	1
63	66	2	60	0	NA	1	1	0	1	321	275	0.3	0.3	2	1	1	1	1	1	1
64	48	2	30	1	0	1	0	1	1	319	229	0.5	0.5	2	1	0	0	0	0	1
65	47	1	60	0	NA	0	NA	0	1	316	260	0.5	0.5	2	1	0	0	0	1	0
66	55	1	95	1	0	1	0	1	1	368	336	0.15	0.15	2	1	1	1	1	1	1
67	35	1	30	1	1	1	0	1	1	618	506	0.4	0.4	1	0	0	0	0	1	1
68	66	1	30	1	0	0	NA	1	2	683	290	0.5	0.5	1	1	1	1	0	1	1
69	49	2	30	1	0	1	0	1	1	1214	1168	0.06	0.06	2	1	1	1	1	1	0
70	40	1	90	1	0	0	NA	0	1	484	194	0.25	0.25	2	0	0	0	1	1	1
71	50	2	30	0	NA	0	NA	1	1	1032	359	0.05	0.05	2	1	1	1	1	1	1
72	41	2	20	1	0	0	NA	1	1	579	292	0.15	0.15	2	1	1	1	1	1	0
73	43	2	120	0	NA	1	1	1	3	588	575	0.6	0.6	2	0	0	0	0	0	1
74	61	2	120	1	0	0	NA	1	1	672	321	0.1	0.1	2	1	1	1	1	1	1
75	67	1	90	1	0	0	NA	0	1	480	348	0.15	0.15	2	1	1	1	1	1	1
